# Supplementary material
Source: PubMed Central journal article supplement (PMC3320767)

## SUPPLEMENTARY TABLE 1: HTGTS LIBRARIES

### 26x I-SceI/ATM<sup>-/-</sup>

| Clone Name              | Integration site | Primer | Treatment | Total hits | Hits on break chr |       | Hits on IgK |       | Hits on Ig/TCR loci |       |
|-------------------------|------------------|--------|-----------|------------|-------------------|-------|-------------|-------|---------------------|-------|
|                         |                  |        |           |            | n                 | %     | n           | %     | n                   | %     |
| Chr2 <sup>I-SceI</sup>  | Chr2-180173673   | 5'     | TA+STI    | 822        | 178               | 21.65 | 136         | 16.55 | 176                 | 21.41 |
| Chr2 <sup>I-SceI</sup>  | Chr2-180173673   | 5'     | TA+STI+IR | 9834       | 4407              | 44.81 | 94          | 0.96  | 126                 | 1.28  |
| Chr7 <sup>I-SceI</sup>  | Chr7-31203181    | 5'     | TA+STI    | 467        | 61                | 13.06 | 67          | 14.35 | 82                  | 17.56 |
| Chr7 <sup>I-SceI</sup>  | Chr7-31203181    | 5'     | TA+STI+IR | 3005       | 802               | 26.69 | 37          | 1.23  | 47                  | 1.56  |
| Chr18 <sup>I-SceI</sup> | Chr18-70688564   | 5'     | TA+STI    | 1378       | 326               | 23.66 | 346         | 25.11 | 425                 | 30.84 |
| Chr18 <sup>I-SceI</sup> | Chr18-70688564   | 5'     | TA+STI+IR | 8591       | 2862              | 33.31 | 279         | 3.25  | 331                 | 3.85  |
| Chr3 <sup>I-SceI</sup>  | Chr3-37646273    | 5'     | TA+STI    | 27         | 16                | 59.26 | 2           | 7.41  | 2                   | 7.41  |
| Chr3 <sup>I-SceI</sup>  | Chr3-37646273    | 5'     | TA+STI+IR | 168        | 55                | 32.74 | 2           | 1.19  | 2                   | 1.19  |
| Chr2A <sup>I-SceI</sup> | Chr2-152188613   | 5'     | TA+STI    | 27         | 7                 | 25.93 | 2           | 7.41  | 3                   | 11.11 |
| Chr2A <sup>I-SceI</sup> | Chr2-152188613   | 5'     | TA+STI+IR | 148        | 44                | 29.73 | 0           | 0     | 1                   | 0.68  |
| Chr13 <sup>I-SceI</sup> | Chr13-76395508   | 5'     | TA+STI    | 32         | 23                | 71.88 | 2           | 6.25  | 4                   | 12.50 |
| Chr13 <sup>I-SceI</sup> | Chr13-76395508   | 5'     | TA+STI+IR | 170        | 54                | 31.95 | 1           | 0.59  | 2                   | 1.18  |
| Total                   |                  |        |           | 24669      | 8835              | 35.81 | 968         | 3.92  | 1201                | 4.87  |

### 25x I-SceI/WT

| Clone Name              | Integration site | Primer | Treatment      | Total hits | Hits on break site |       | Hits on IgK |      | Hits on Ig/TCR loci |      |
|-------------------------|------------------|--------|----------------|------------|--------------------|-------|-------------|------|---------------------|------|
|                         |                  |        |                |            | n                  | %     | n           | %    | n                   | %    |
| Chr2B <sup>I-SceI</sup> | Chr2-148388069   | 5'     | TA+STI+ATMi    | 1839       | 164                | 8.92  | 93          | 5.06 | 111                 | 6.04 |
| Chr2B <sup>I-SceI</sup> | Chr2-148388069   | 5'     | TA+STI+ATMi+IR | 1284       | 452                | 35.2  | 34          | 2.65 | 42                  | 3.27 |
| Chr2B <sup>I-SceI</sup> | Chr15-5565929    | 5'     | TA+STI         | 1815       | 117                | 6.45  | 2           | 0.11 | 4                   | 0.22 |
| Chr15 <sup>I-SceI</sup> | Chr15-5565929    | 5'     | TA+STI+ATMi    | 3575       | 179                | 5.01  | 85          | 2.38 | 104                 | 2.91 |
| Chr15 <sup>I-SceI</sup> | Chr15-5565929    | 5'     | TA+STI+IR      | 2489       | 243                | 9.76  | 0           | 0    | 5                   | 0.2  |
| Total                   |                  |        |                | 11002      | 1155               | 10.50 | 214         | 1.95 | 266                 | 2.42 |

### DEL-CJ/F1

| Library Name | Integration site | Treatment   | Total hits | Total SNP hits | Hits on break site chromosome |        | Hits on non-break site chromosomes |        |
|--------------|------------------|-------------|------------|----------------|-------------------------------|--------|------------------------------------|--------|
|              |                  |             |            |                | 129                           | BALB/c | 129                                | BALB/c |
| YZ198        | Chr7-133846876   | STI+ATMi+IR | 3632       | 344            | 8                             | 55     | 151                                | 130    |
| YZ212        | Chr7-133846876   | STI+ATMi+IR | 12322      | 1184           | 18                            | 76     | 446                                | 565    |
| YZ224        | Chr7-133846876   | STI+ATMi+IR | 5448       | 561            | 14                            | 68     | 218                                | 261    |
| YZ196        | Chr9-75863761    | STI+ATMi+IR | 3227       | 301            | 86                            | 12     | 89                                 | 114    |
| YZ211        | Chr9-75863761    | STI+ATMi+IR | 6160       | 469            | 126                           | 10     | 149                                | 184    |
| YZ223        | Chr9-75863761    | STI+ATMi+IR | 3919       | 380            | 106                           | 18     | 111                                | 145    |
| Total        |                  |             | 34708      | 3239           | 358                           | 239    | 1164                               | 1399   |

## Supplementary Table 2: Hi-C libraries.

### 26x I-SceI/ATM<sup>-/-</sup>

| Hi-C Data Cell Line     | Biological Replicate | Unique Interaction Pairs |
|-------------------------|----------------------|--------------------------|
| Chr2 <sup>I-SceI</sup>  | 1                    | 45,122,598               |
| Chr2 <sup>I-SceI</sup>  | 2                    | 49,316,157               |
| Chr7 <sup>I-SceI</sup>  | 1                    | 34,679,715               |
| Chr18 <sup>I-SceI</sup> | 1                    | 16,553,041               |
| Chr18 <sup>I-SceI</sup> | 2                    | 38,046,959               |
| <b>Total</b>            |                      | 183,718,470              |

### 26x I-SceI/WT

| Hi-C Data Cell Line     | Biological Replicate | Unique Interaction Pairs |
|-------------------------|----------------------|--------------------------|
| Chr2 <sup>I-SceI</sup>  | 1                    | 69,572,672               |
| Chr15 <sup>I-SceI</sup> | 1                    | 13,734,501               |
| <b>Total</b>            |                      | 83,307,173173            |

A

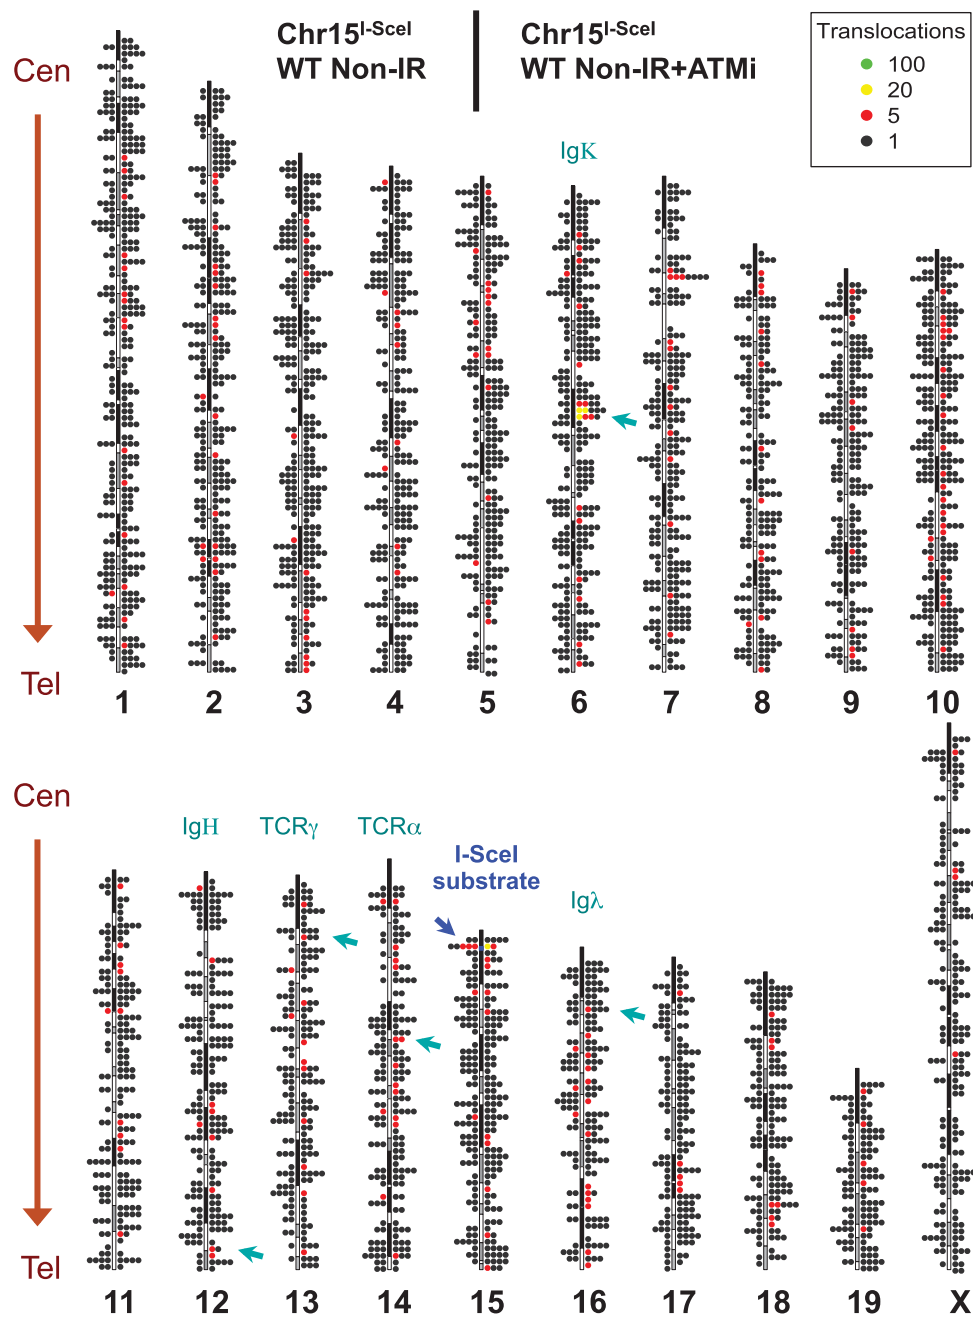

B

|                          | WT                      | WT                      | WT                      | ATM <sup>-/-</sup>      | ATM <sup>-/-</sup>      |
|--------------------------|-------------------------|-------------------------|-------------------------|-------------------------|-------------------------|
| Starting DNA + human DNA | Chr15 <sup>I-SceI</sup> | Chr15 <sup>I-SceI</sup> | Chr15 <sup>I-SceI</sup> | Chr18 <sup>I-SceI</sup> | Chr18 <sup>I-SceI</sup> |
|                          | TA+STI                  | TA+STI+IR               | TA+STI+ATMi+IR          | TA+STI                  | TA+STI+IR               |
| Mouse translocations     | 177                     | 286                     | 534                     | 713                     | 435                     |
| Human "translocations"   | 15                      | 25                      | 11                      | 12                      | 4                       |
| background               | 8.50%                   | 8.70%                   | 2.10%                   | 1.68%                   | 1.15%                   |

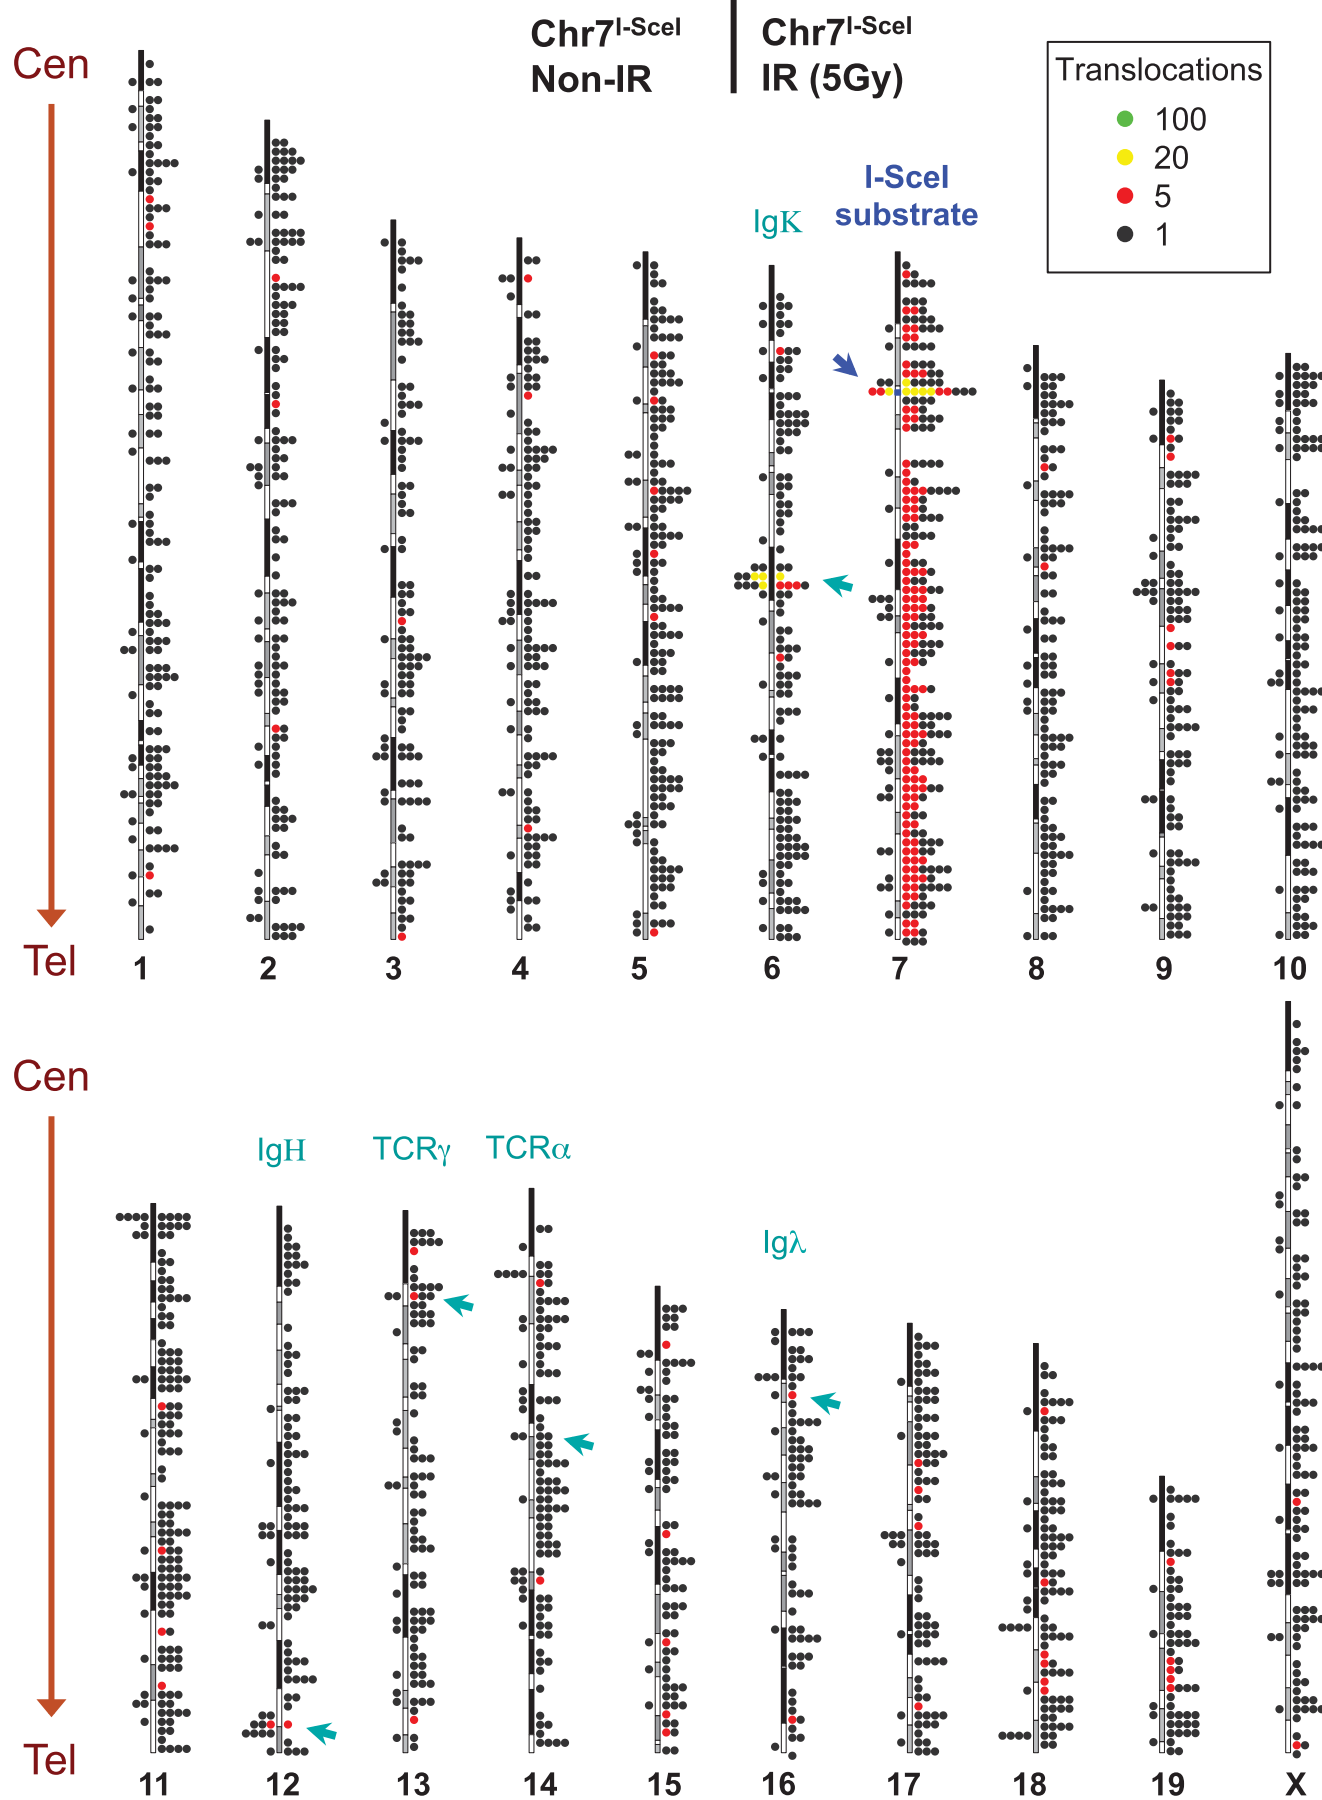

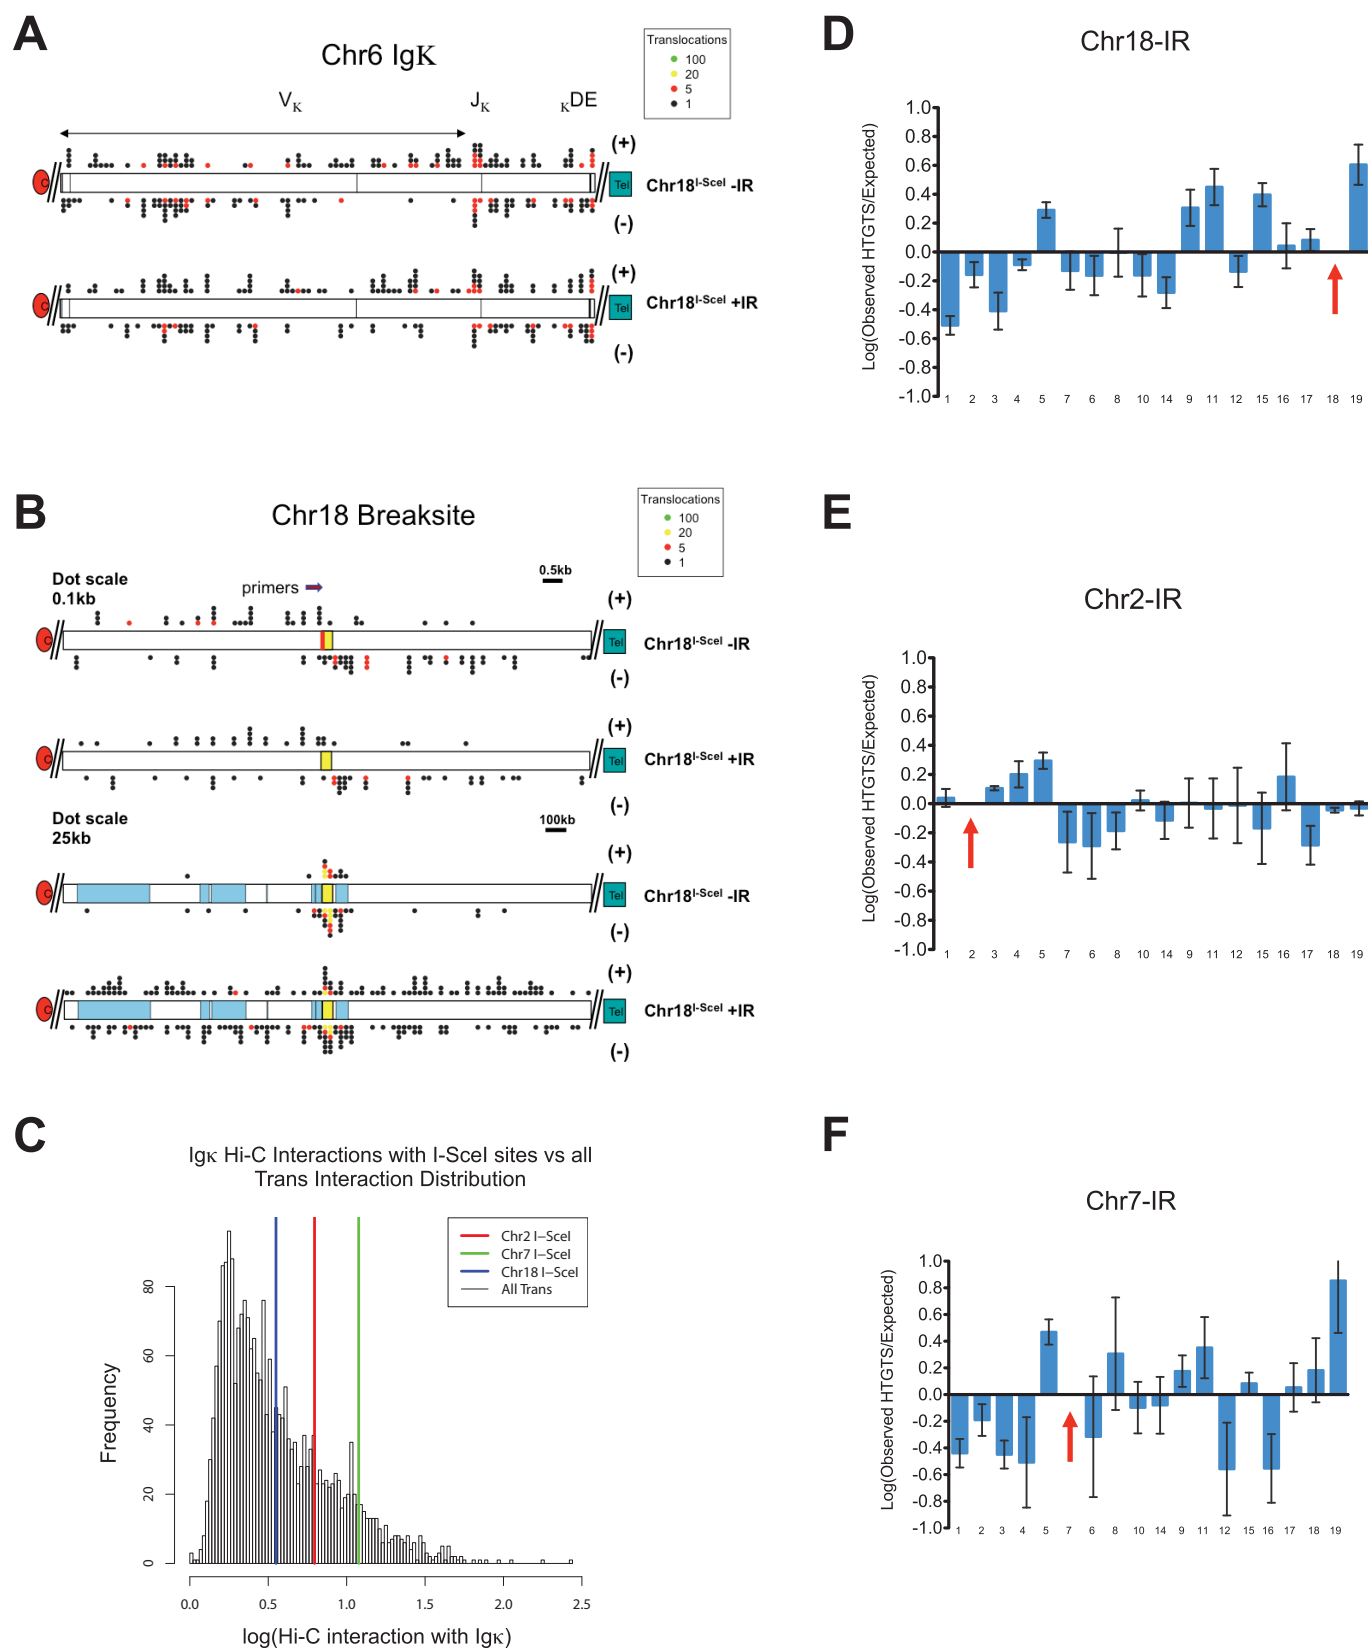

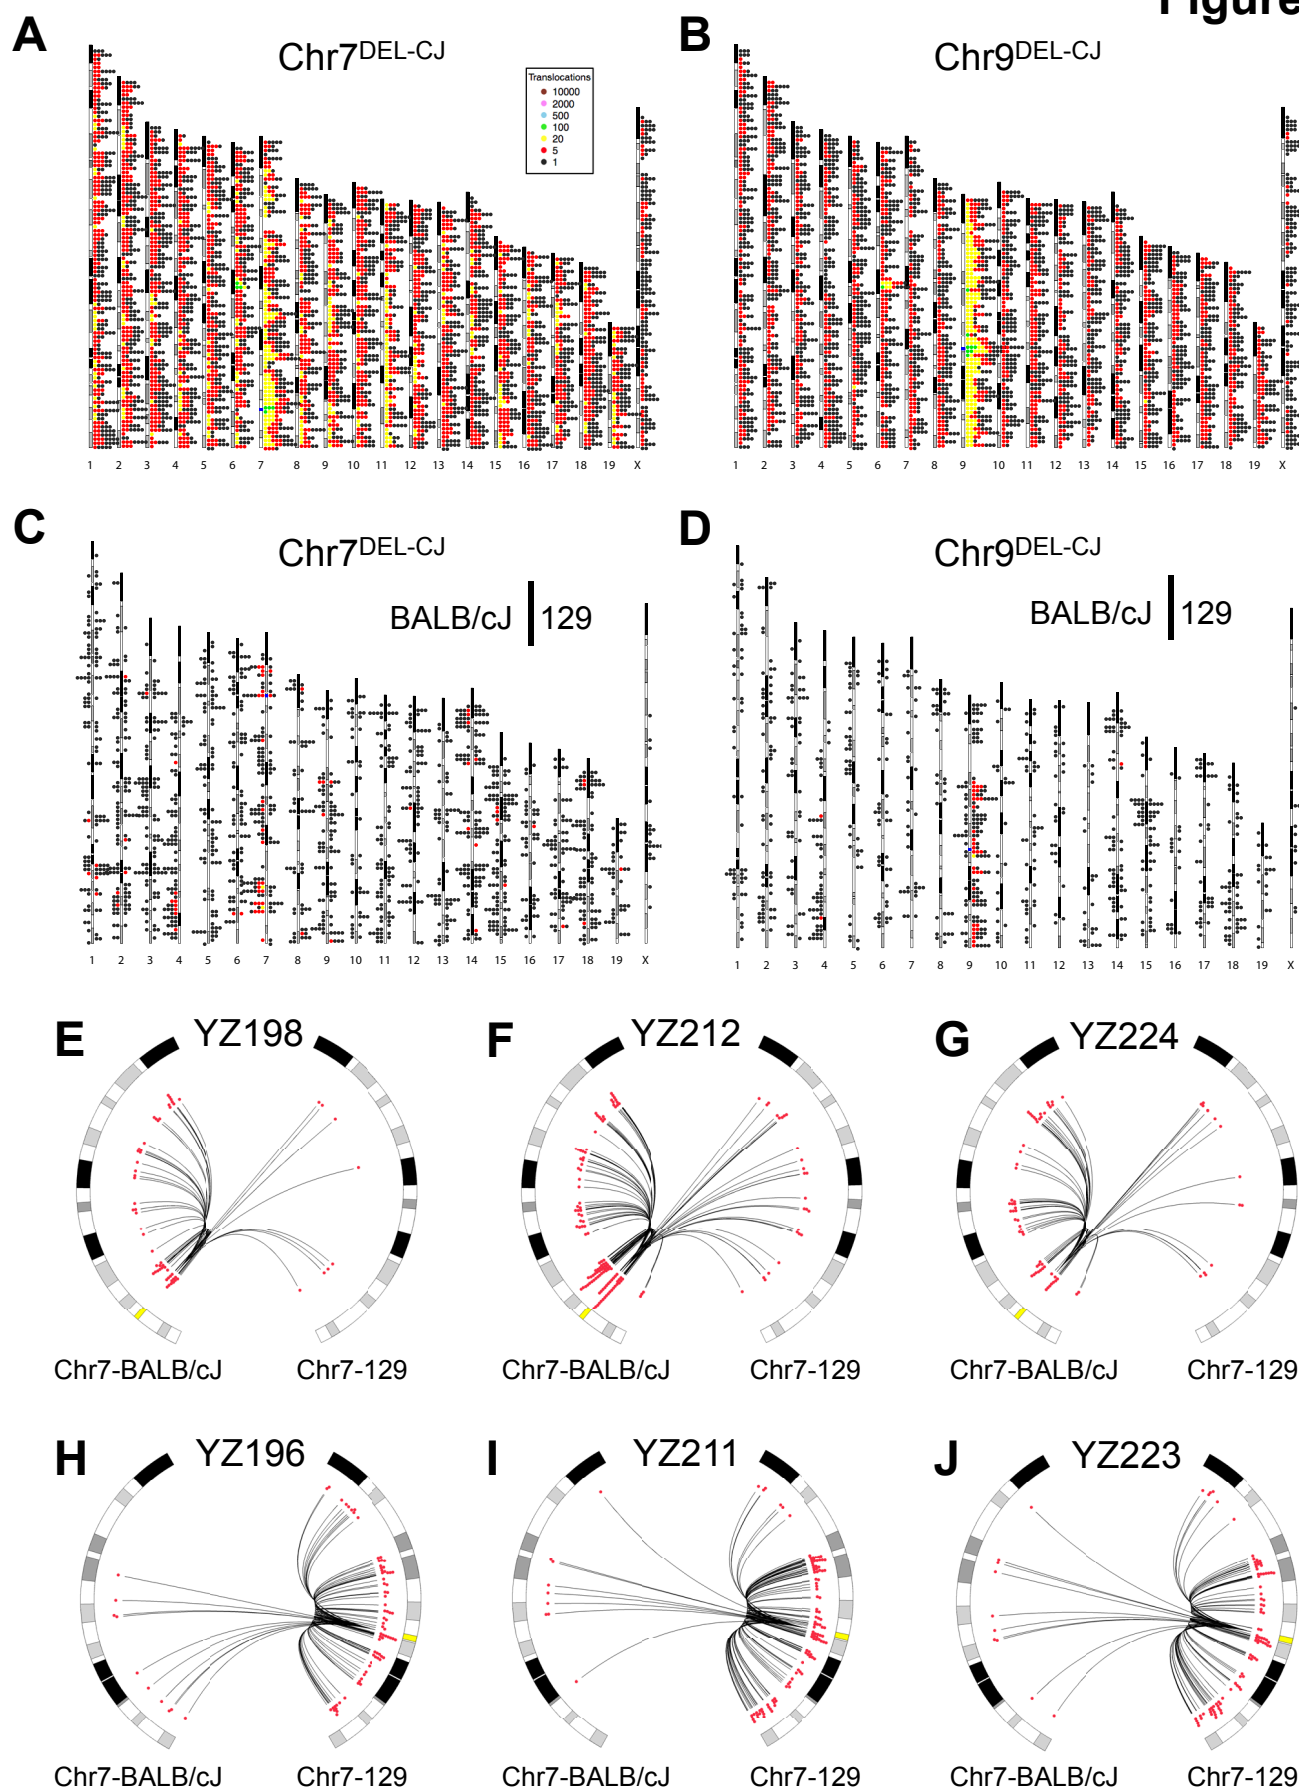

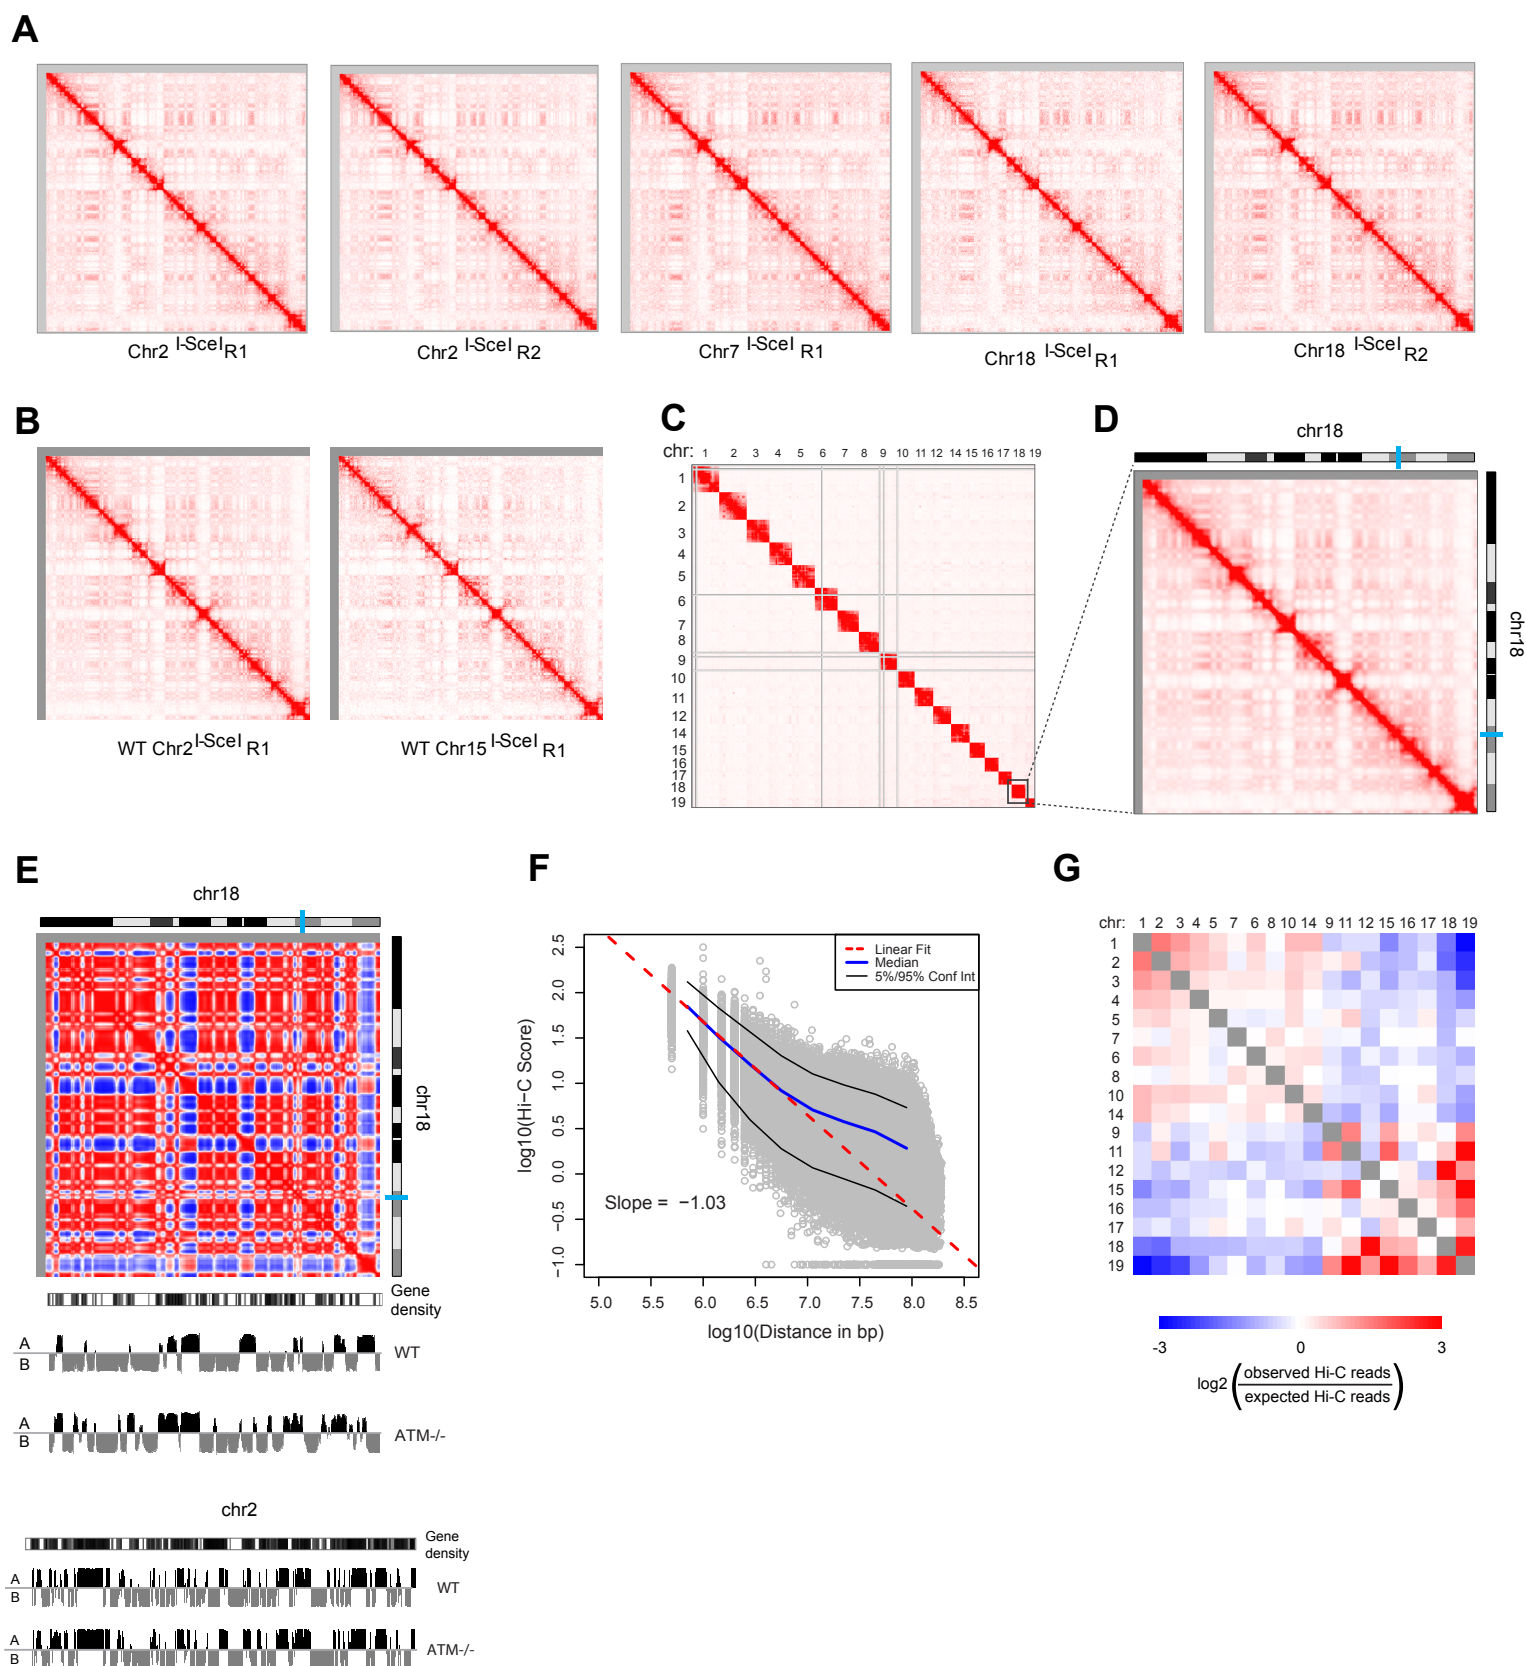

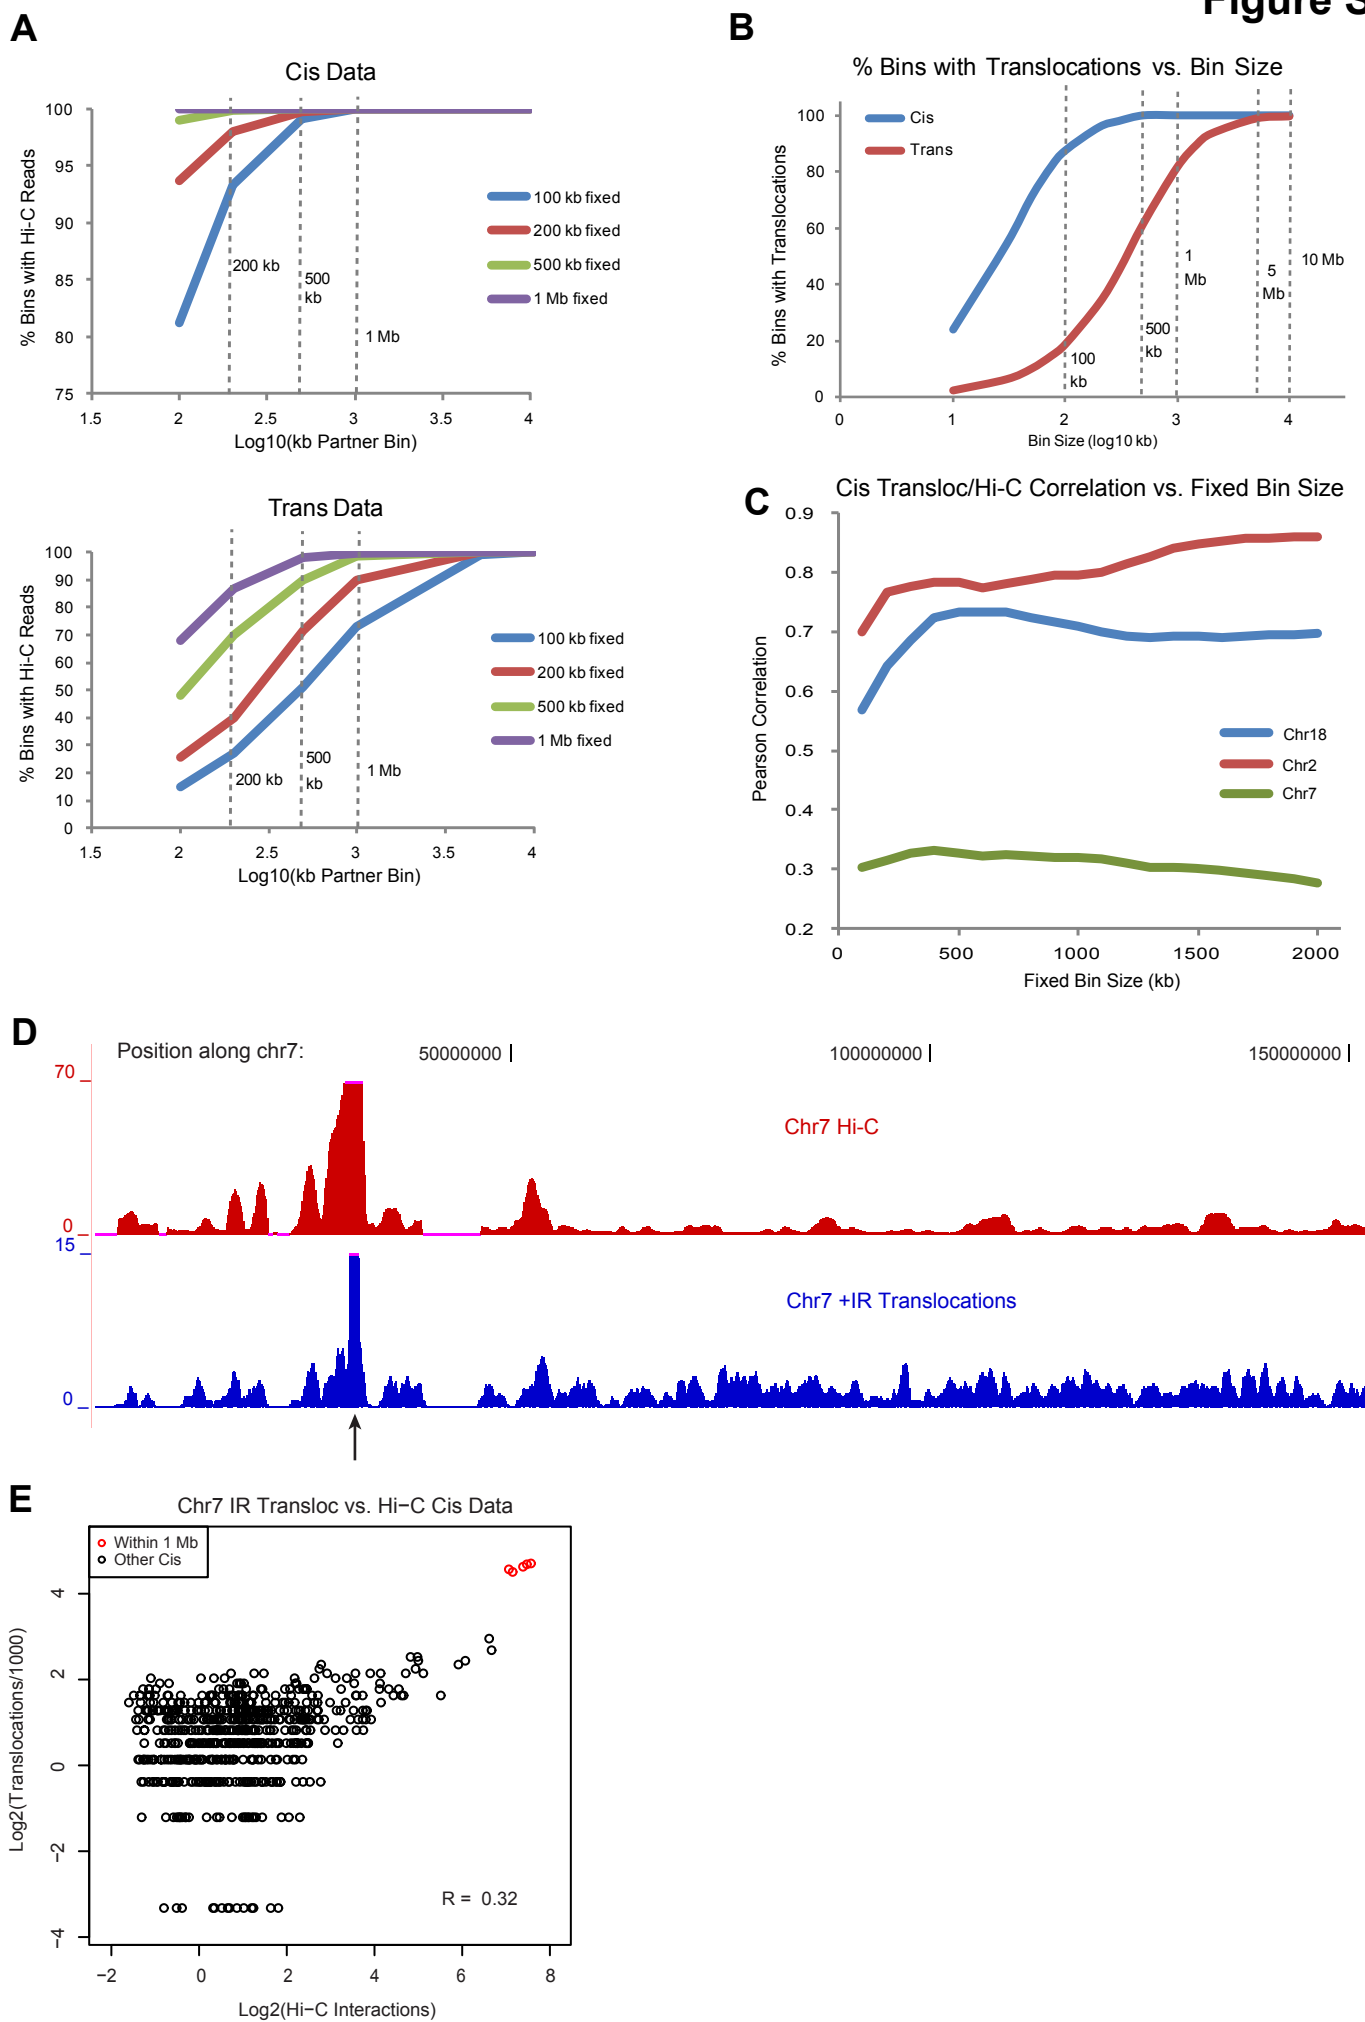



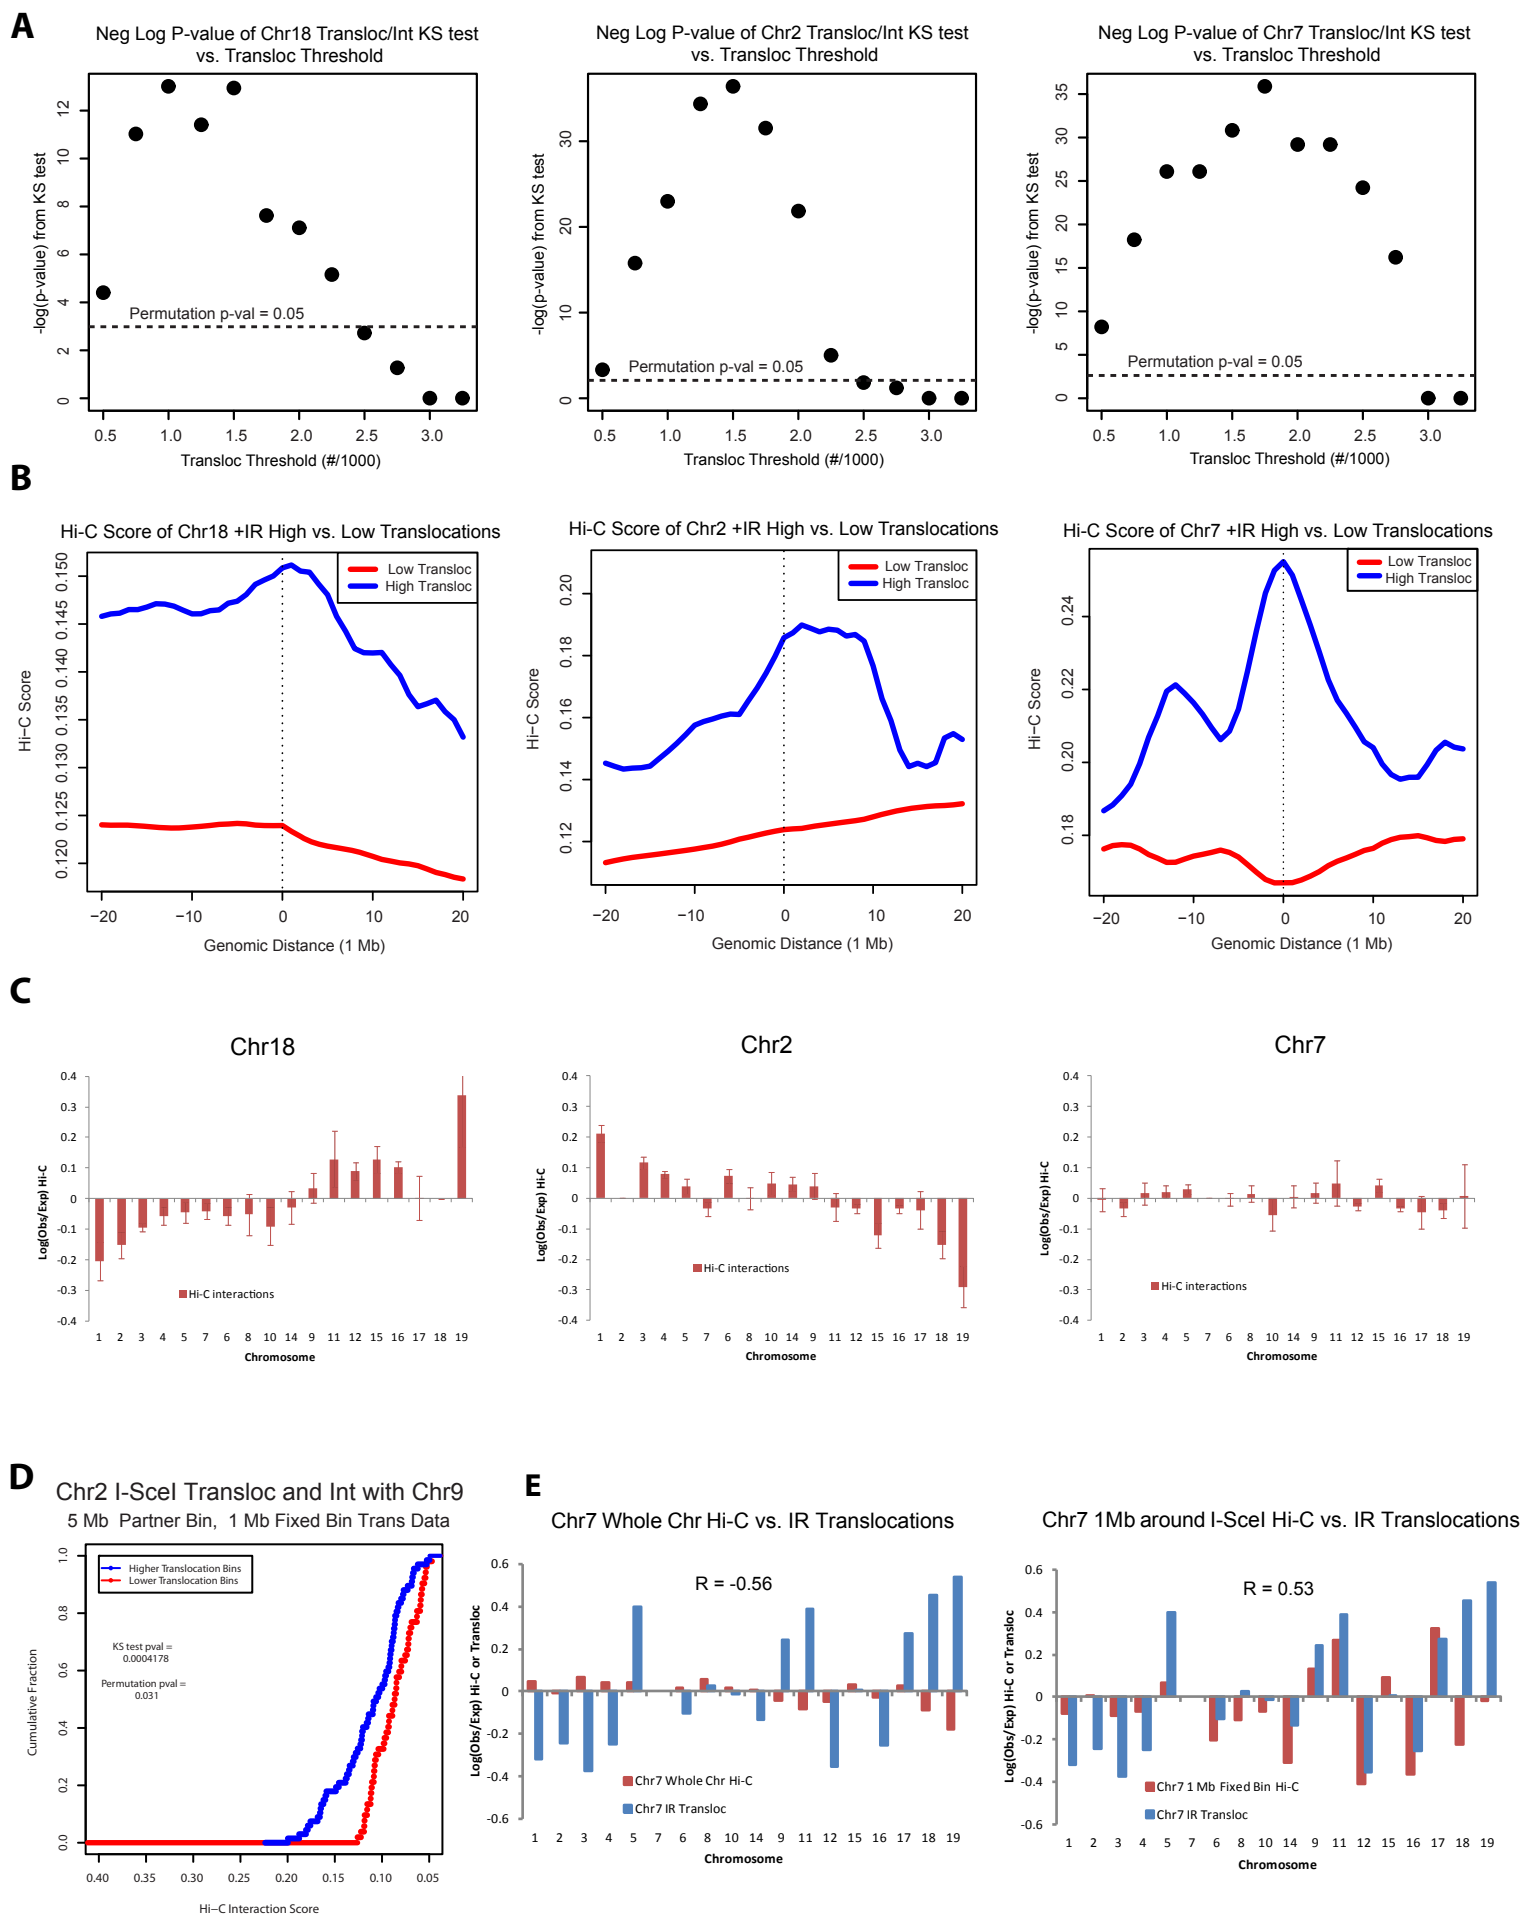

Supplement: NIHMS357930-supplement-02.pdf [file NIHMS357930-supplement-02.pdf]
